# Supplementary material
Source: PubMed Central journal article supplement (PMC9180428)
Supplement: mmc1.pdf [file mmc1.pdf]

# THE LANCET

## Child & Adolescent Health

### Supplementary appendix

This translation in French was submitted by the authors and we reproduce it as supplied. It has not been peer reviewed. *The Lancet's* editorial processes have only been applied to the original in English, which should serve as reference for this manuscript.

Cette traduction en français a été proposée par les auteurs et nous l'avons reproduite telle quelle. Elle n'a pas été examinée par des pairs. Les processus éditoriaux du *Lancet* n'ont été appliqués qu'à l'original en anglais et c'est cette version qui doit servir de référence pour ce manuscrit.

Supplement to: Lachassinne E, de Pontual L, Caseris M, et al. SARS-CoV-2 transmission among children and staff in daycare centres during a nationwide lockdown in France: a cross-sectional, multicentre, seroprevalence study. *Lancet Child Adolesc Health* 2021; published online Feb 8. [http://dx.doi.org/10.1016/S2352-4642\(21\)00024-9](http://dx.doi.org/10.1016/S2352-4642(21)00024-9).

## **French language version of the abstract (Résumé)**

**Contexte.** Le rôle des très jeunes enfants dans la transmission de la maladie à coronavirus 2019 (COVID-19) est encore incertain. La description de la séroprévalence des anticorps contre le coronavirus 2 du syndrome respiratoire aigu sévère (SARS-CoV-2) dans les crèches restées ouvertes pour accueillir les enfants des travailleurs essentiels pendant la période de confinement pourrait fournir des informations à cet égard.

**Méthodes.** Entre le 4 juin et le 3 juillet 2020, les enfants et le personnel qui avaient fréquenté l'une des 22 crèches pendant le confinement national de la France (du 15 mars au 9 mai 2020) ont été inclus de manière prospective. Un groupe comparateur comprenait des personnels hospitaliers non exposés professionnellement aux patients et/ou aux enfants. La présence d'anticorps anti-SRAS-CoV-2 dans le sang total capillaire a été déterminée via un test sérologique immunochromatographique rapide. La séroprévalence brute est exprimée sous forme du pourcentage d'individus avec un test positif en IgG ou IgM. Une méthode de lissage bayésien est utilisée pour tenir compte de la sensibilité et de la spécificité imparfaites du test.

**Résultats.** Nous avons recruté 327 enfants (âge moyen  $\pm$  écart-type:  $1,9 \pm 0,9$  ans), 197 membres du personnel soignant et 164 adultes dans le groupe comparateur. Les tests sérologiques étaient positifs chez 14 enfants (prévalence brute [intervalle de confiance à 95%] = 4,3% [2,6, 7,1]) et 14 membres du personnel de crèche (7,7% [4,2, 11,6]). Après avoir pris en compte la sensibilité et la spécificité du test, il est estimé que 3,7% (intervalle de crédibilité à 95% [1,3, 6,8]) des enfants et 6,8% [3,2, 11,5] du personnel avaient été infectés par le SRAS-CoV-2. Les résultats étaient similaires dans le groupe comparateur avec une séroprévalence de 5,5% [2,9, 10,1], et un taux d'infection estimé à 5,0% [1,6, 9,8] après prise

en compte des caractéristiques intrinsèques du test ( $p=0,53$ ). Une analyse exploratoire a suggéré que les enfants séropositifs étaient plus susceptibles que les enfants séronégatifs d'avoir été exposés à domicile à un adulte avec une infection confirmée au COVID-19 (43% contre 6%, respectivement, RR = 7,1 [2,2, 22,4]).

**Interprétation.** Selon les résultats des tests sérologiques, la proportion d'enfants ayant été infectés était faible. Une contamination intrafamiliale est plus plausible qu'une transmission au sein des crèches, bien que cette hypothèse nécessite d'être confirmée par d'autres études épidémiologiques.

**Financement.** Assistance Publique - Hôpitaux de Paris; Mairie de Paris, Conseil Départemental de Seine Saint Denis.
