# Supplementary material
Source: PubMed Central journal article supplement (PMC9180428)
Supplement: mmc2.pdf [file mmc2.pdf]

# THE LANCET

## Child & Adolescent Health

### Supplementary appendix

This appendix formed part of the original submission and has been peer reviewed. We post it as supplied by the authors.

Supplement to: Lachassinne E, de Pontual L, Caseris M, et al. SARS-CoV-2 transmission among children and staff in daycare centres during a nationwide lockdown in France: a cross-sectional, multicentre, seroprevalence study. *Lancet Child Adolesc Health* 2021; published online Feb 8. [http://dx.doi.org/10.1016/S2352-4642\(21\)00024-9](http://dx.doi.org/10.1016/S2352-4642(21)00024-9).

## Supplemental table: Symptoms on inclusion in the study groups

|                     | <b>Children attending<br/>daycare centres<br/>N = 314 *</b> | <b>Daycare centre staff<br/>N = 185 *</b> | <b>Comparator group<br/>N = 160 *</b> |
|---------------------|-------------------------------------------------------------|-------------------------------------------|---------------------------------------|
| Fever               | 1% (n=3)                                                    | 0% (n=0)                                  | 1% (n=1)                              |
| Respiratory signs   | 18% (n=58)                                                  | 10% (n=19)                                | 9% (n=14)                             |
| dyspnoea            | 0% (n=0)                                                    | 0% (n=1)                                  | 0% (n=1)                              |
| cough               | 6% (n=19)                                                   | 3% (n=6)                                  | 4% (n=6)                              |
| rhinitis            | 17% (n=54)                                                  | 6% (n=12)                                 | 6% (n=10)                             |
| otitis              | 2% (n=5)                                                    | 0% (n=1)                                  | 1% (n=2)                              |
| conjunctivitis      | 0% (n=1)                                                    | 2% (n=3)                                  | 1% (n=2)                              |
| Abdominal signs     | 3% (n=10)                                                   | 3% (n=6)                                  | 2% (n=3)                              |
| diarrhoea           | 2% (n=7)                                                    | 1% (n=2)                                  | 1% (n=2)                              |
| vomiting            | 0% (n=1)                                                    | 0% (n=0)                                  | 1% (n=2)                              |
| abdominal pain      | 1% (n=2)                                                    | 2% (n=4)                                  | 1% (n=1)                              |
| Loss of appetite    | 2% (n=5)                                                    | 1% (n=2)                                  | 1% (n=2)                              |
| Skin signs          | 2% (n=6)                                                    | 0% (n=1)                                  | 1% (n=1)                              |
| Changes in behavior | 2% (n=6)                                                    |                                           |                                       |
| Headache            | 0% (n=0)                                                    | 9% (n=18)                                 | 2% (n=3)                              |
| Asthenia            | 0% (n=0)                                                    | 5% (n=10)                                 | 1% (n=2)                              |
| Myalgia             |                                                             | 0% (n=0)                                  | 1% (n=1)                              |
| Anosmia             |                                                             | 0% (n=0)                                  | 1% (n=1)                              |
| Ageusia             |                                                             | 0% (n=0)                                  | 1% (n=1)                              |
| Chest pain          |                                                             | 0% (n=0)                                  | 1% (n=1)                              |
| Joint pain          |                                                             | 2% (n=3)                                  | 1% (n=2)                              |

\* participants with data on the presence or absence of symptoms
